# Supplementary material for: A Systematic Review and Meta-Analysis of Basal and Post-Stress Circulating Cortisol Concentration in an Important Marine Aquaculture Fish Species, European Sea Bass, Dicentrarchus labrax
Source: Animals (Basel). 2023 Apr 13;13(8):1340. doi: 10.3390/ani13081340 (PMC10135258; doi:10.3390/ani13081340)
Supplement: Supplementary file 1 [file animals-13-01340-s001.zip › Table S2.pdf]

**Supplementary Table S2.** Criteria for excluding studies due to the eligibility criteria.

| Excluded study | Exclusion reason                                                                                   |
|----------------|----------------------------------------------------------------------------------------------------|
| [16]           | Not possible to attribute the data to control or post-stress conditions due to experimental design |
| [26]           | Data presented as tank mean                                                                        |
| [27]           | Lack of information on dispersion data                                                             |
| [28]           | No provision of number of animals under study                                                      |
| [29]           | Lack of information on dispersion data                                                             |
| [30]           | Data on control fish were shared with [93]                                                         |
| [31]           | Lack of information on dispersion of data                                                          |
| [32]           | Lack of information on dispersion of data                                                          |
